# Supplementary material for: Multi-Omics Unravels Metabolic Alterations in the Ileal Mucosa of Neonatal Piglets Receiving Total Parenteral Nutrition
Source: MDPI journal article supplement (doi:10.3390/metabo13040555), 2023-04-13
Supplement: s1 [file s1]

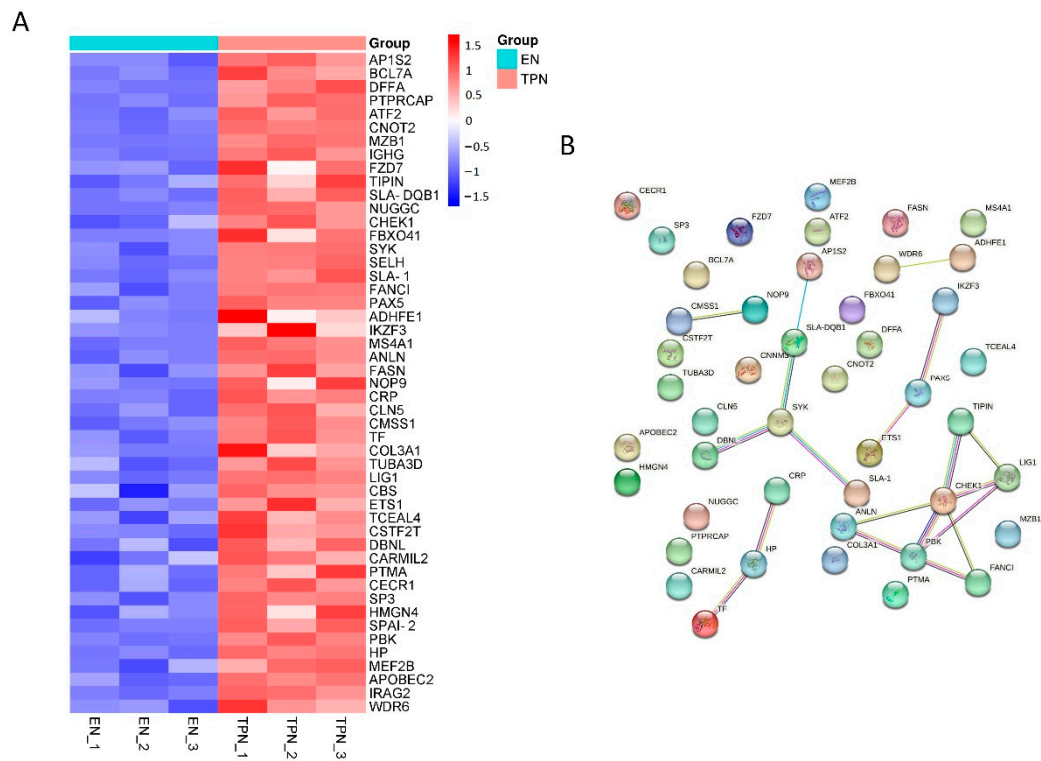

**Figure S1. Top 50 up-regulated proteins in TPN piglets** (A) Heatmap of top 50 up-regulated proteins in TPN piglets. (B) Protein-protein interaction (PPI) analysis among top 50 up-regulated proteins.



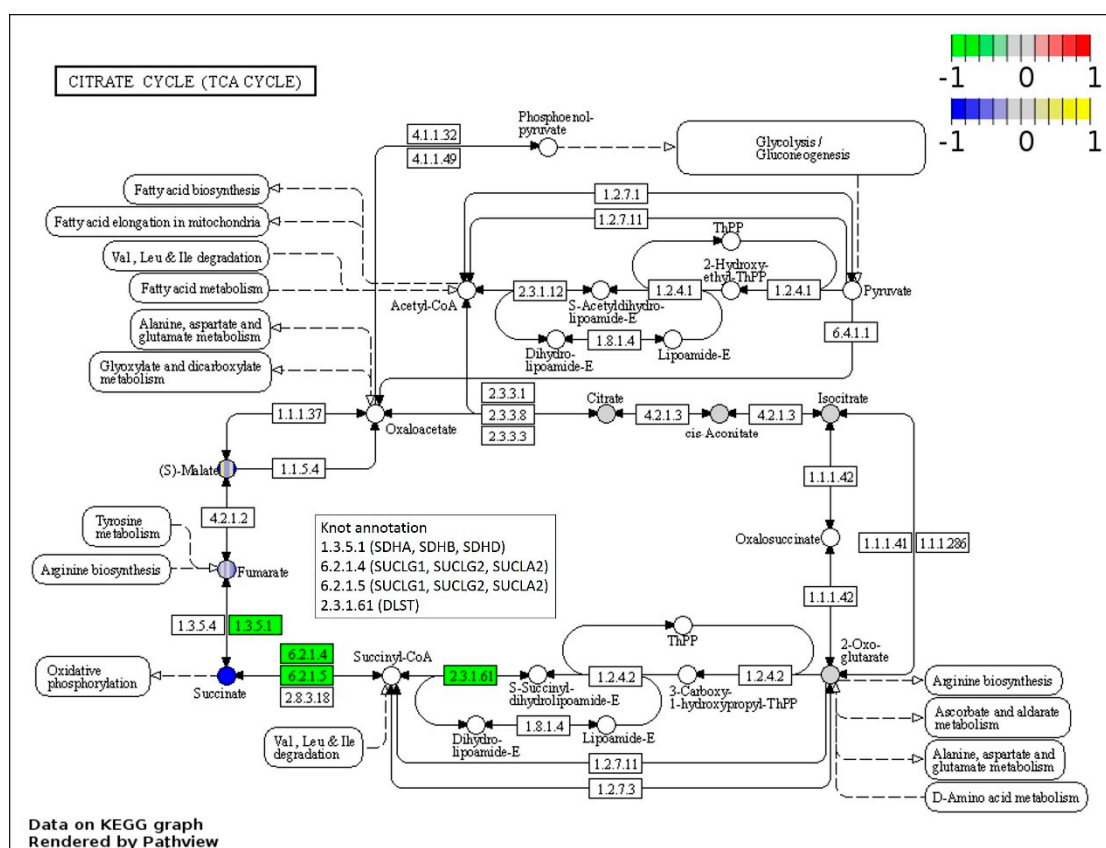

**Figure S3. KEGG pathway plotting for the altered proteins and metabolites involved in Citrate cycle.**
